# Supplementary material for: Kidney-specific WNK1 amplifies kidney tubule responsiveness to potassium via WNK body condensates
Source: JCI journal article supplement (doi:10.1172/jci188792), 2025-06-10

Figure 2 Uncropped Blots

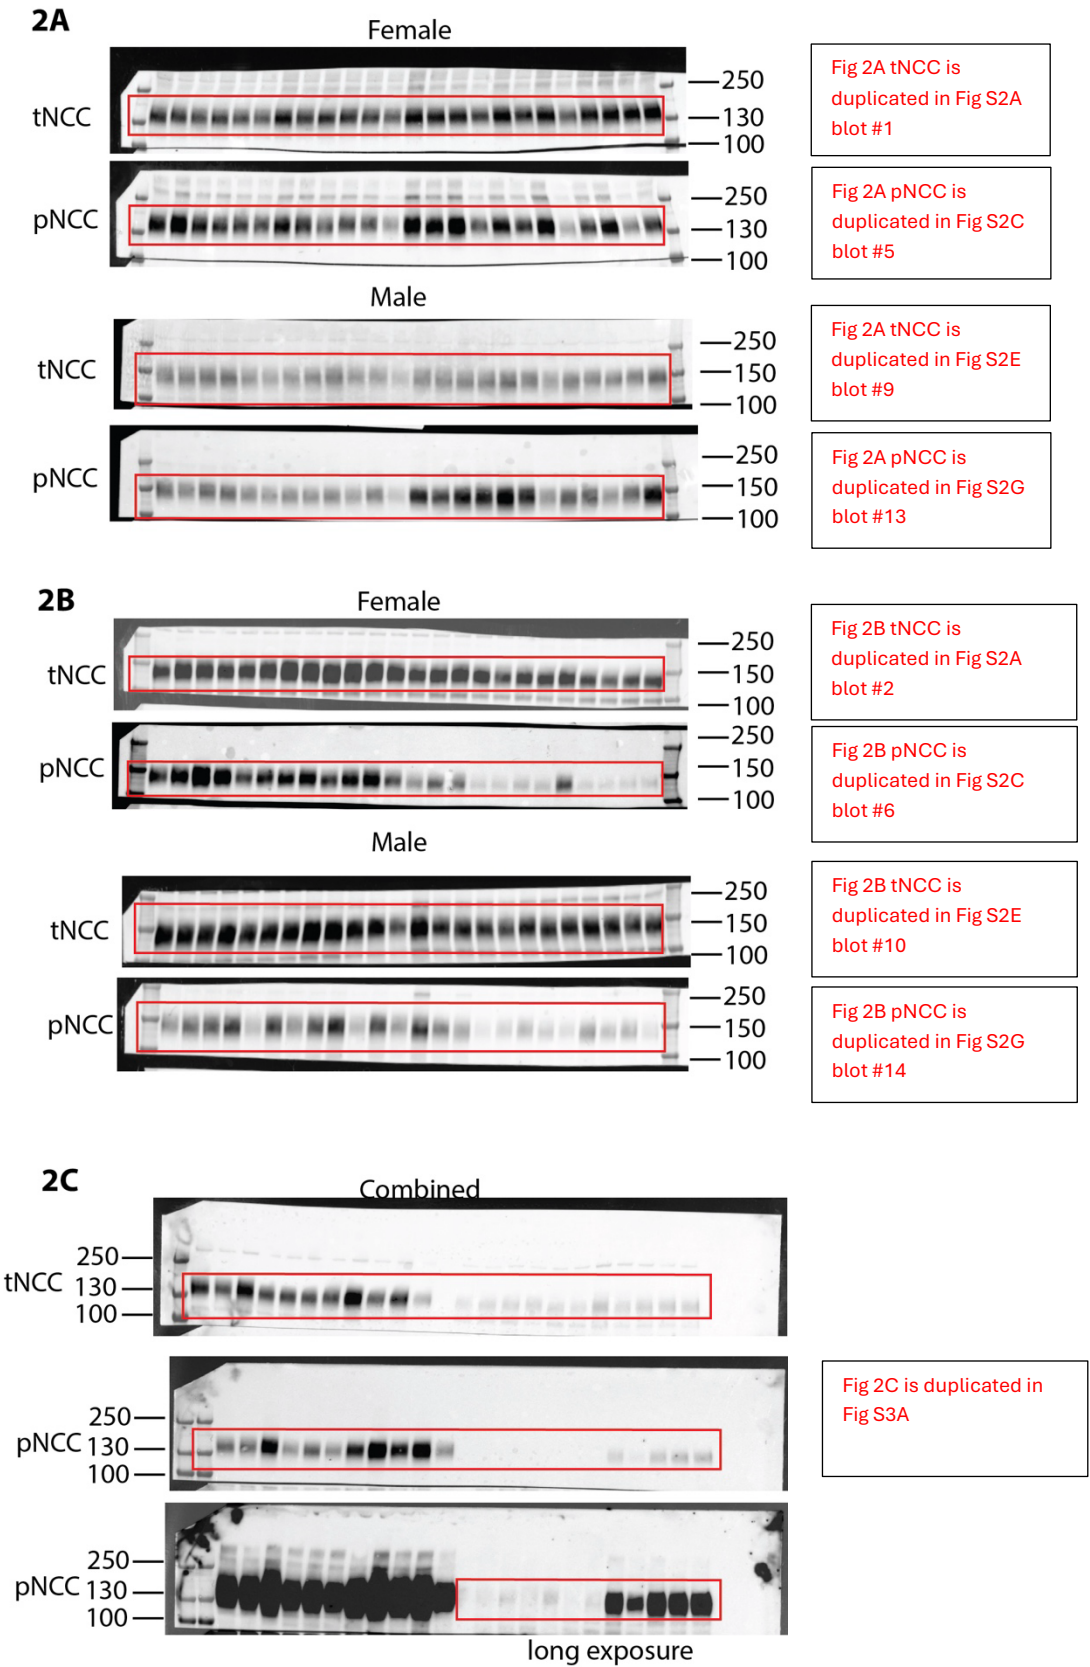

Figure 5A Uncropped Blots

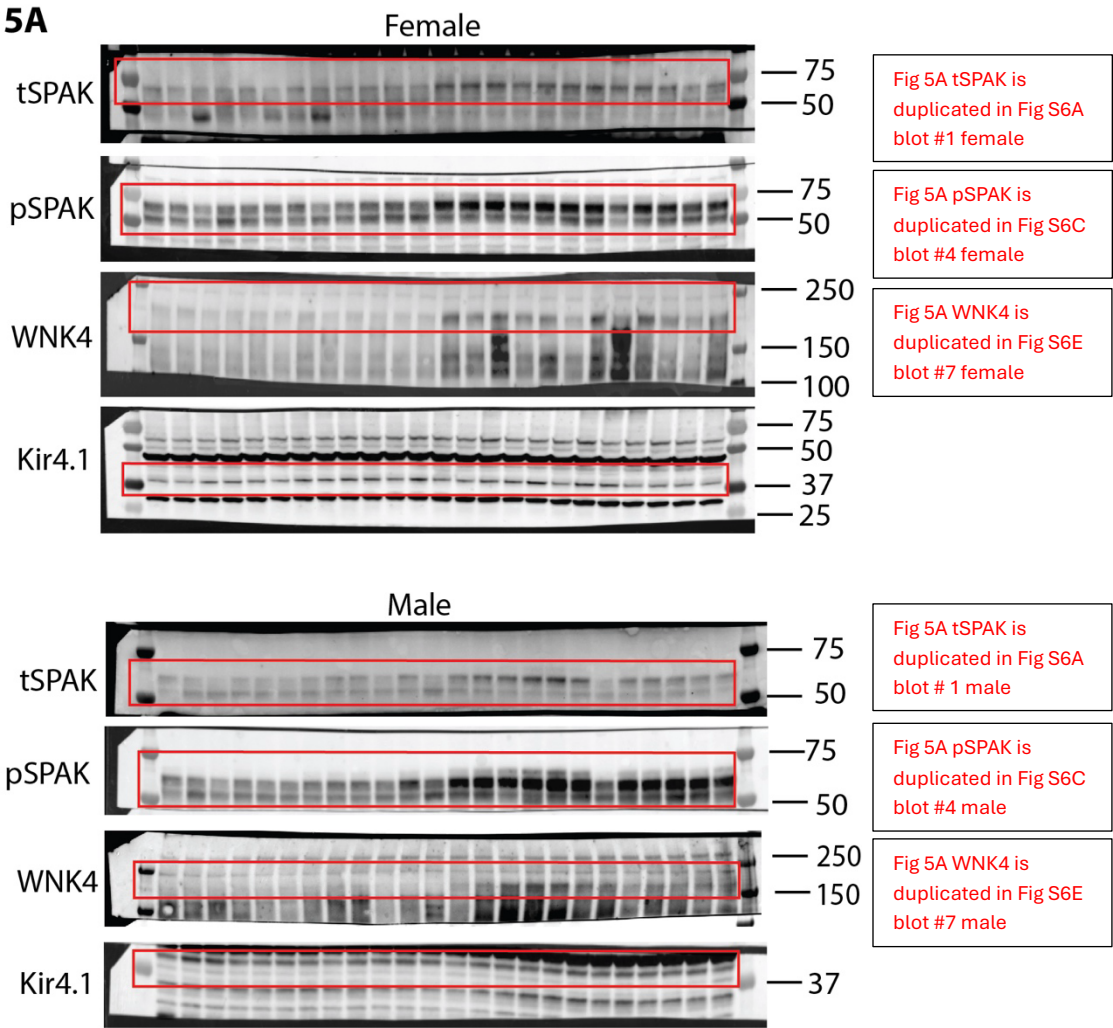

Figure 5B Uncropped Blots

**5B**

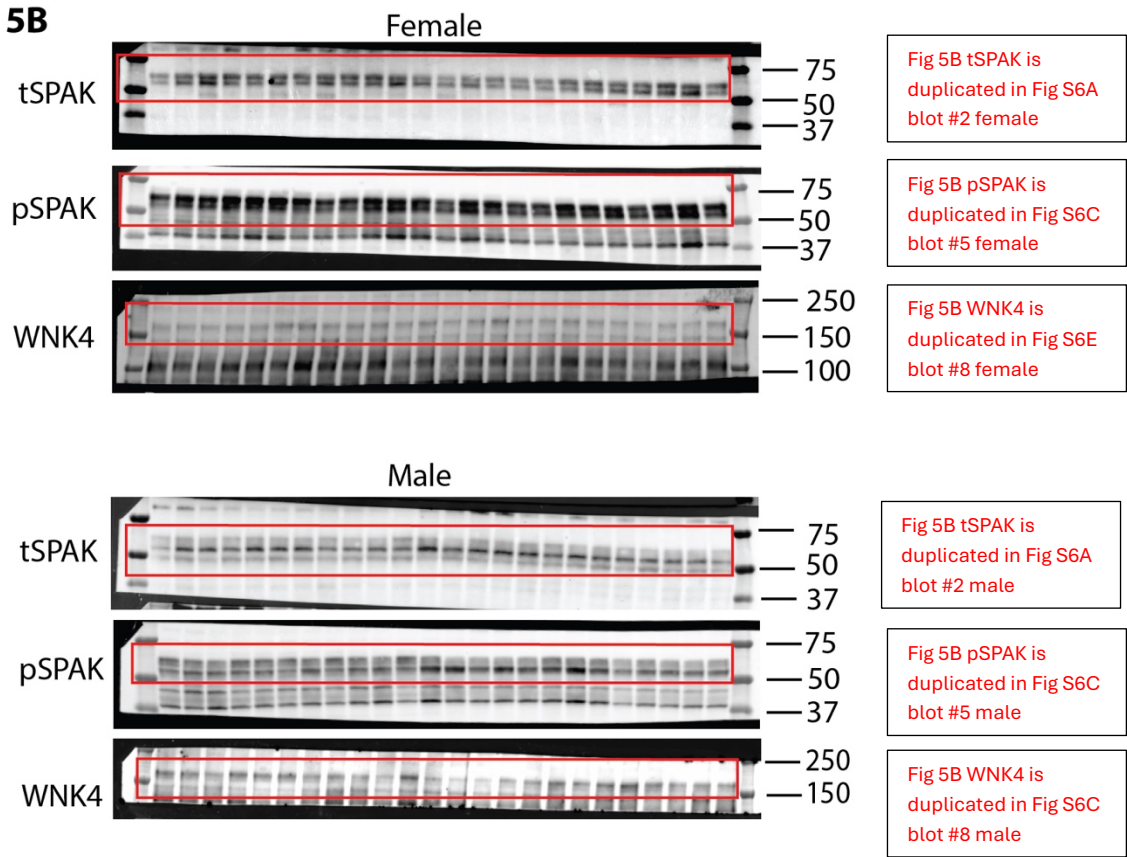

Figure 5C Uncropped Blots

**5C**

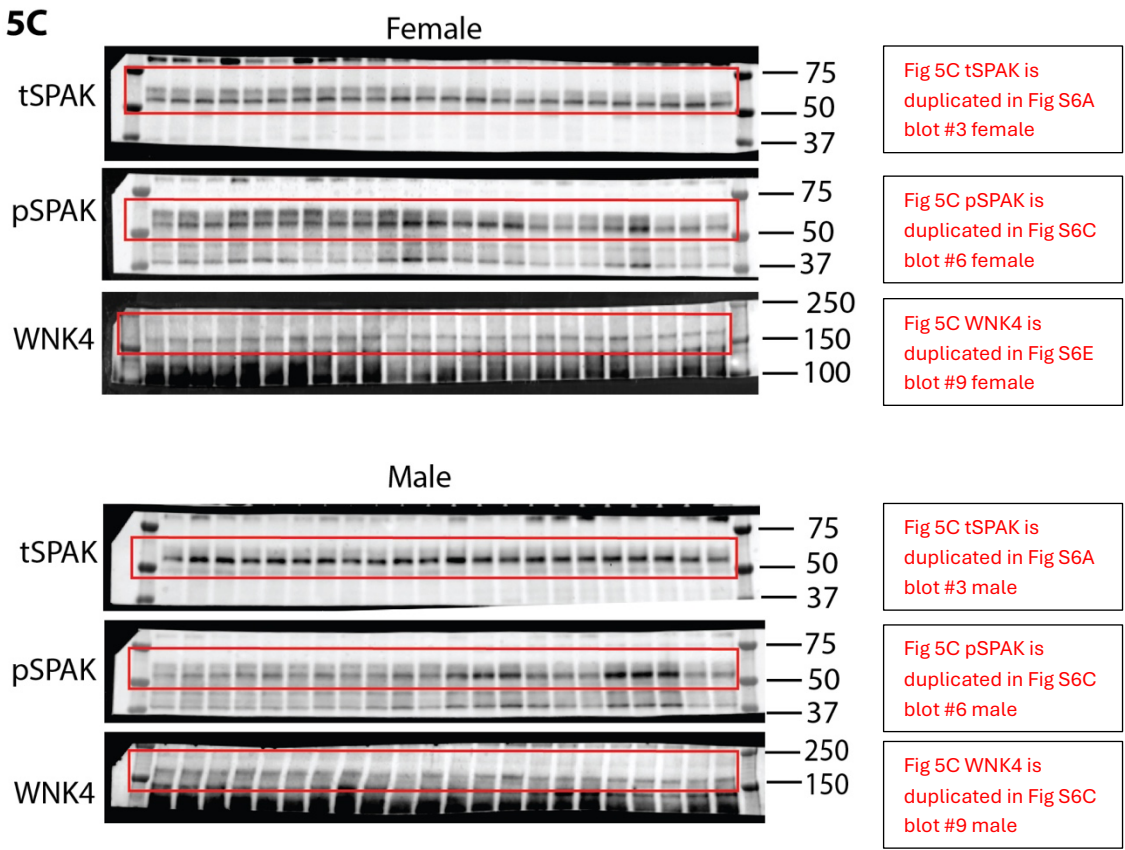

Figure 10A Uncropped Blots

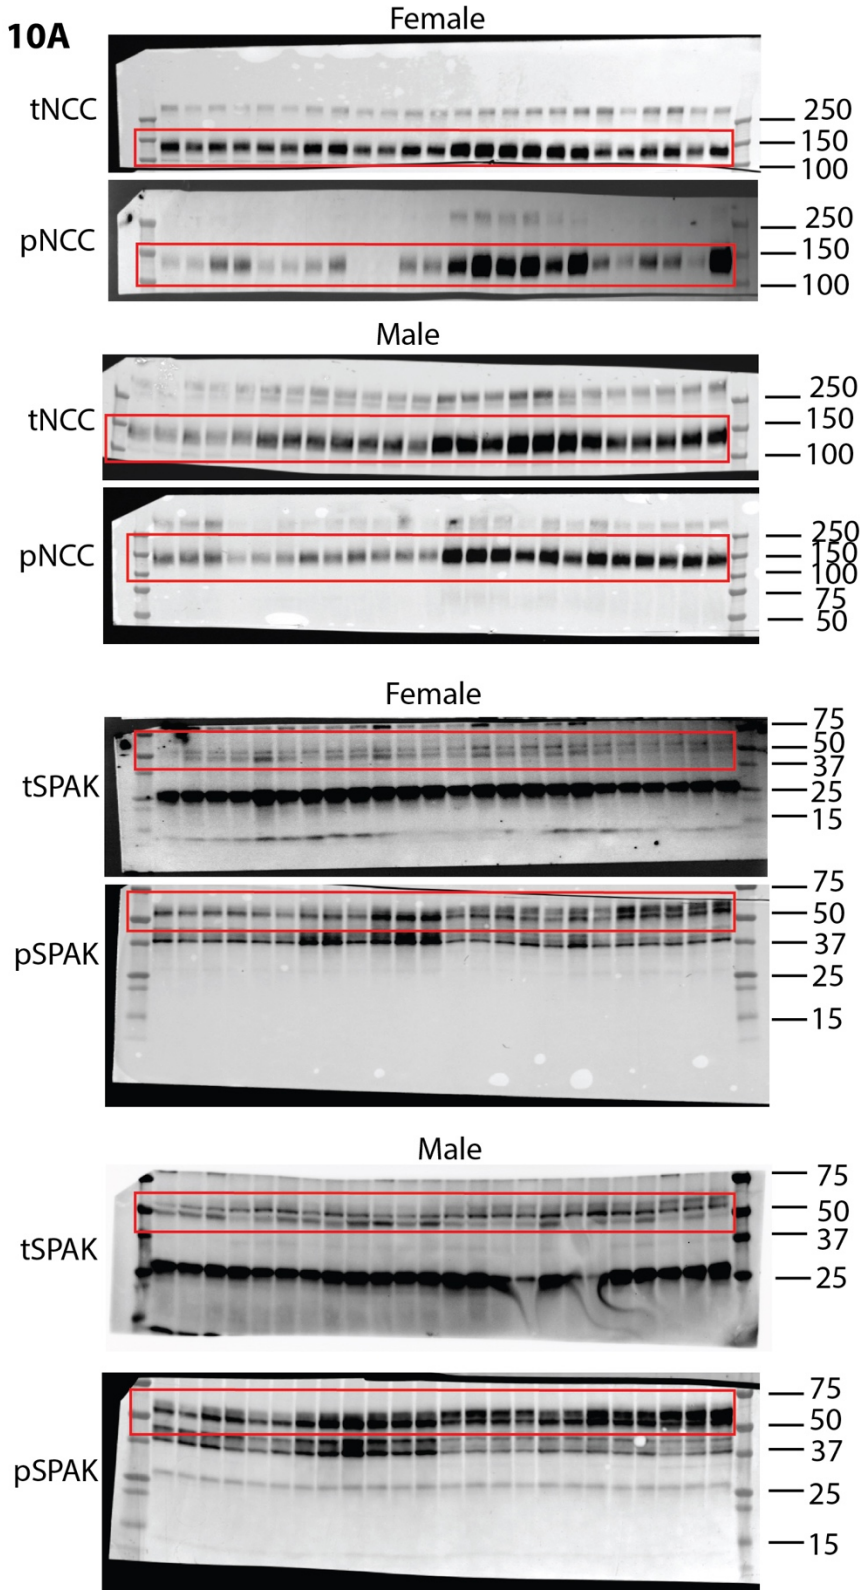



Figure S3 Uncropped Blots

**S3A**

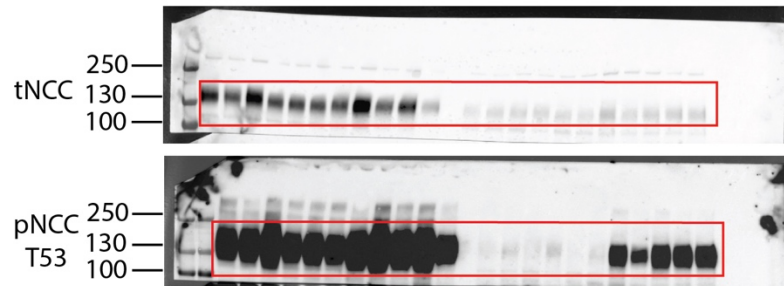

Fig S3A is duplicate  
of Fig 2C

**S3B**

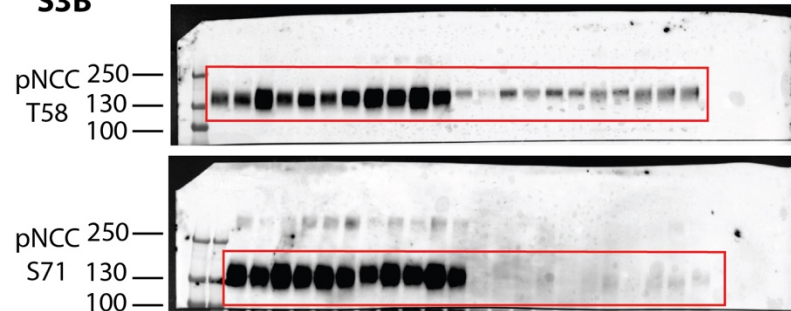

**S3C**

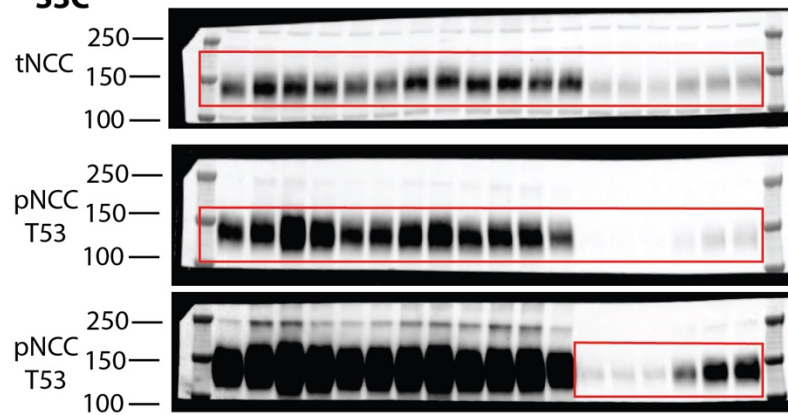

**S3D**

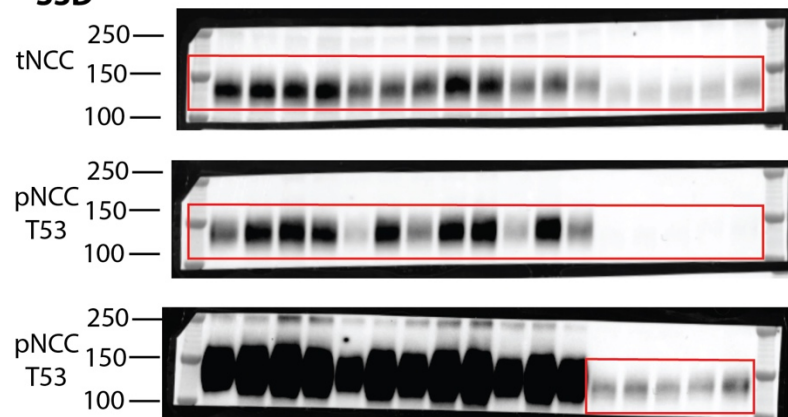

Figure S4 Uncropped Blots

**S4A**

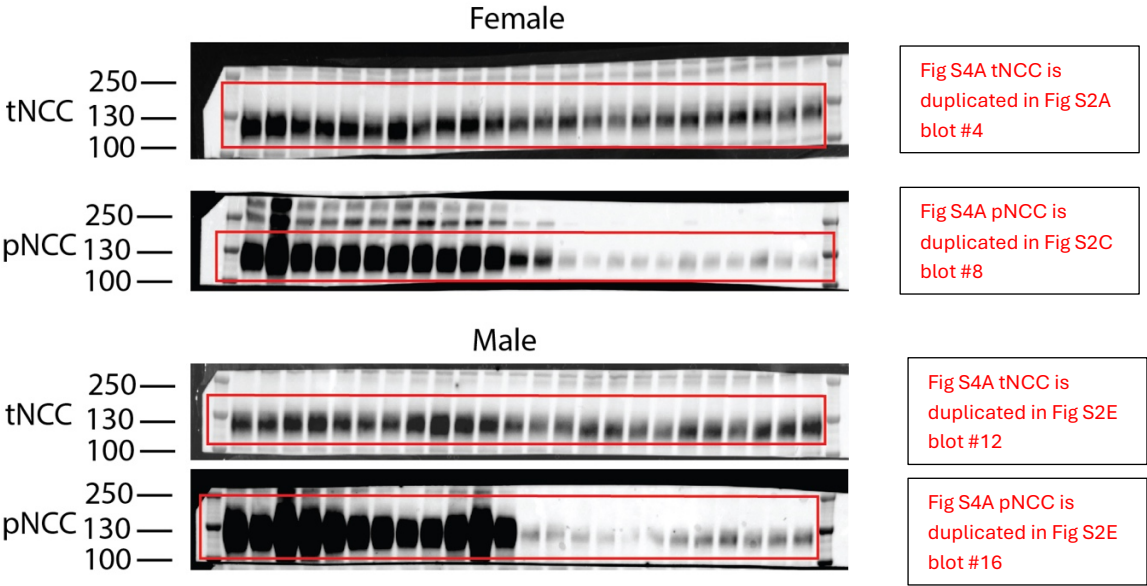

Figure S7 Uncropped Blots

**S7A**

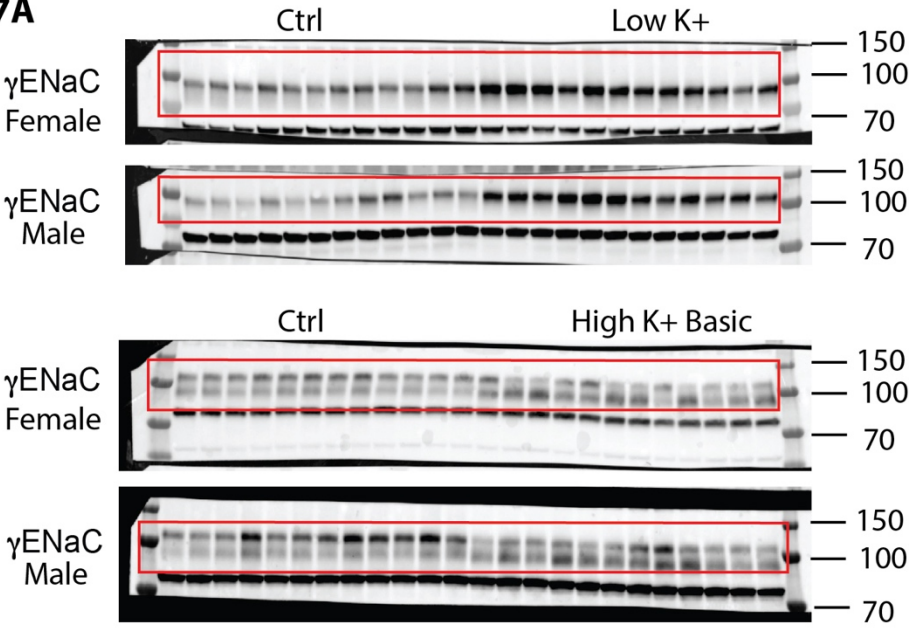

**S7D**

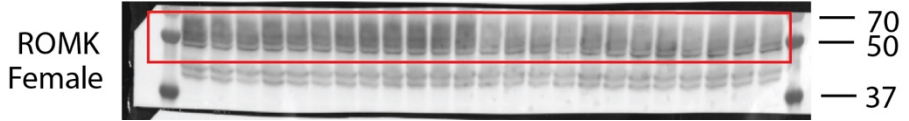

Supplement: sd1 [file 1]
